# Supplementary material
Source: publisher site journal article supplement (https://www.spandidos-publications.com/6873/downloadSupplementary)
Supplement: Supplementary file 1 [file downloadSupplementary]

Table SI. siRNA sequences used in the present study.

| Target   | Sequence (5'-3')                                                  |
|----------|-------------------------------------------------------------------|
| siDNMT1  | Sense: GAAGAGACGUAGAGUUACATT<br>Antisense: UGU AACUCUACGUCUCUUCTT |
| siDNMT3A | Sense: GCCUGGAGCCACCAGAAGATT<br>Antisense: UCUUCUGGUGGCUCCAGGCTT  |
| siDNMT3B | Sense: CCAAGCGCCUCAAGACAAATT<br>Antisense: UUUGUCUUGAGGCGCUUGGTT  |
| siNC     | Sense: UUCUCCGAACGUGUCACGUTT<br>Antisense: ACGUGACACGUUCGGAGAATT  |

si, short interfering RNA; DNMT, DNA methyltransferase; NC, negative control.

Table SII. Primer sequences used for reverse transcription-quantitative PCR.

| Gene           | Sequence (5'-3')                                       |
|----------------|--------------------------------------------------------|
| HOXD1          | F: C TTCAGCACGTTTCGAGTGGAT<br>R: TGACTTGCGTGTCATTCAGGT |
| DNMT1          | F: TCAAAACCGCTGTATCTAGCAAG<br>R: AGAACCAGTGGGCGTGAAAC  |
| DNMT3A         | F: CTGGGTCATGTGGTTCGGA<br>R: TCGTAGATGGCTTTGCGGT       |
| DNMT3B         | F: GTTGGGCATAAAGGTAGGAAAGT<br>R: TCCGCCAATCACCAAGTCA   |
| BMP2           | F: GCCAAACACAAACAGCGGAA<br>R: GGGAGCCACAATCCAGTCAT     |
| BMP6           | F: TCATTGCACCCAAGGGCTAT<br>R: GCACGGTTTGGGGACATACT     |
| $\beta$ -actin | F: CTTAGTTGCGTTACACCCTTTCT<br>R: TGCTGTCACCTTCACCGTTC  |
| GAPDH          | F: GAACGGGAAGCTCACTGG<br>R: GCCTGCTTCACCACCTTCT        |

HOX, homeobox; DNMT, DNA methyltransferase; BMP, bone morphogenetic protein; F, forward; R, reverse.

Table SIII. Primers used for targeted bisulfite sequencing.

---

| Gene    | Sequence (5'-3')                                                                     |
|---------|--------------------------------------------------------------------------------------|
| HOXD1-1 | F: GTCTCTACTAAAAATACAAAAAATTAGCCGGGCATAGTG<br>R: CAATTATACTATAACCAATCAAATAAAATCCTAAA |
| HOXD1-2 | F: GAAATATTAAAGGAAGTTGGAAAGTTTG<br>R: TTCTACTCCATCAAATAAATACTACATC                   |
| HOXD1-3 | F: GACGTGCTCAGCTTGGCACCCAAGTTCTG<br>R: TTCGTAGGCCCCCTCCAGGGTGC ACT                   |

---

HOX, homeobox; F, forward; R, reverse.

---

Table SIV. Primers used for chromatin immunoprecipitation-quantitative PCR.

| Gene              | Segment             | Sequence (5'-3')                                          |
|-------------------|---------------------|-----------------------------------------------------------|
| HOXD1 promoter F1 | -2,000 to -1,801 bp | F: ATAGTGGTGGGCGCCTGTAG<br>R: TAAGTGCAGTGGCGCGATC         |
| HOXD1 promoter F2 | -1,800 to -1,501 bp | F: GCAAAATCAAGATTGAAGGGC<br>R: CCAGTAGAGGGTGGATGCCTA      |
| HOXD1 promoter F3 | -1,500 to -1,201 bp | F: GCTGTGATGGGCGCCTATT<br>R: GGTAACCGAGGTTTTATCATTG       |
| HOXD1 promoter F4 | -1,200 to -901 bp   | F: TTTATTTCCCGTCTCTCTACACTC<br>R: TCGTCTCTTGTGAGTGAAATCTG |
| HOXD1 promoter F5 | -900 to -601 bp     | F: GATTCTTTATTCCAACAACCCAGC<br>R: TTGTGGCGGCGTGATGAG      |
| HOXD1 promoter F6 | -600 to -301 bp     | F: AGGATAACATCAGCGCCA<br>R: TGGAAAAGGTTAAATGGGAGC         |
| HOXD1 promoter F7 | -300 to -1 bp       | F: AGCGTCCAGTCCTGCCTTT<br>R: AAGTTAGCCAAAGCAGCCCA         |

HOX, homeobox; F, forward; R, reverse.
